# Supplementary material for: Travel-Time Disparities in Access to Proton Beam Therapy for Cancer Treatment
Source: PubMed Central journal article supplement (PMC11102024; doi:10.1001/jamanetworkopen.2024.10670), 2024-05-17
Supplement: jamanetwopen-e2410670-s002.pdf [file jamanetwopen-e2410670-s002.pdf]

## Data Sharing Statement

Burus. Travel-Time Disparities in Access to Proton Beam Therapy for Cancer Treatment. *JAMA Netw Open*. Published May 09, 2024. doi:10.1001/jamanetworkopen.2024.10670

### Data

**Data available:** No

### Additional Information

**Explanation for why data not available:** All data used in this work is publicly available
